# Supplementary material
Source: PubMed Central journal article supplement (PMC8015241)
Supplement: develop-148-192401-s1.pdf [file develop-148-192401-s1.pdf]

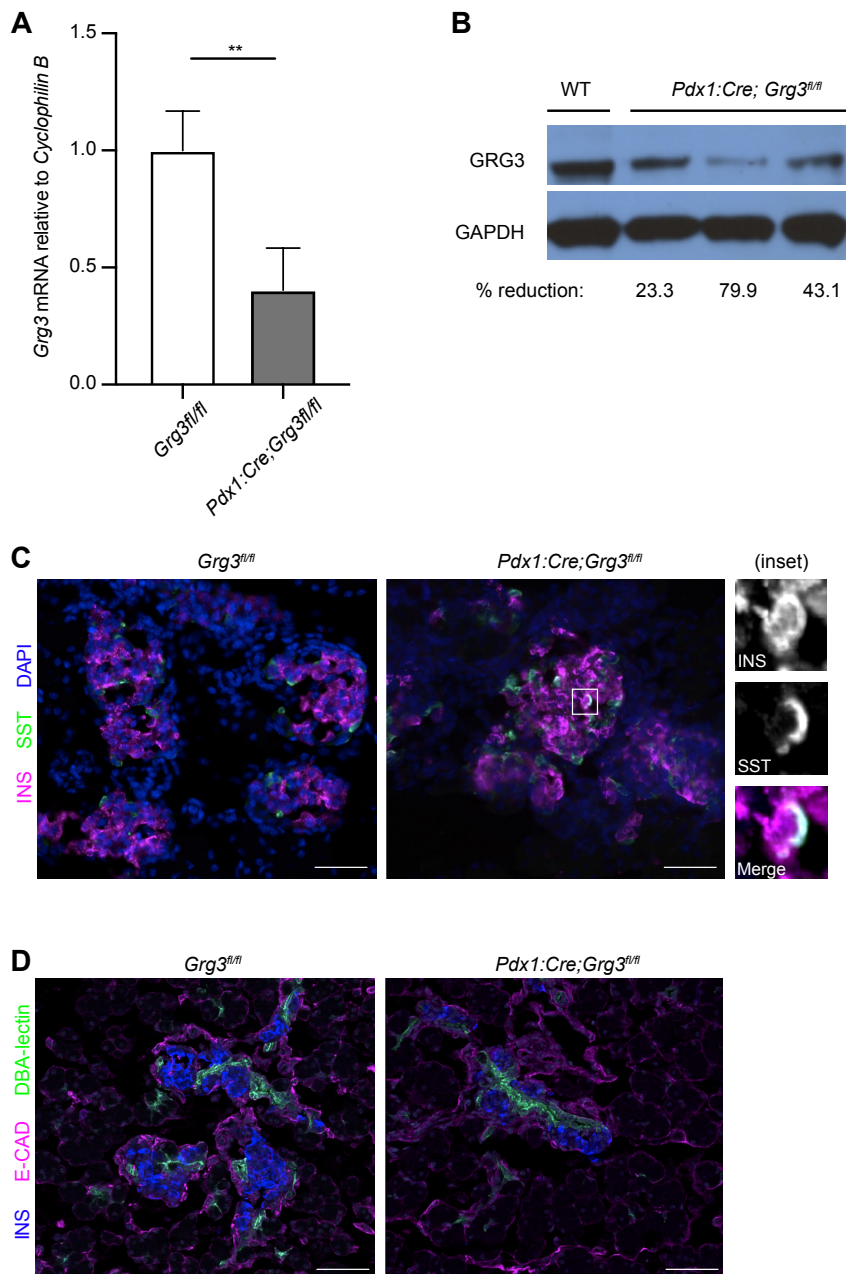

**Figure S1. Validation of pancreas-specific *Grg3* knockout.**

(A) *Grg3* mRNA levels are decreased in 8 week isolated islets from *Pdx1:Cre; Grg3<sup>fl/fl</sup>* mutants as measured by qPCR. n = 3 for each genotype. \*\* $P < 0.01$ ; two-tailed student's t-test. (B) Western blot of protein from P0 pancreata showing reduction of GRG3 protein in *Pdx1:Cre; Grg3<sup>fl/fl</sup>* animals. (C) Immunofluorescent staining of 6 week *Pdx1:Cre; Grg3<sup>fl/fl</sup>*

islets hormones. Inset shows example of bihormonal INS+/SST+ cell in *Pdx1:Cre; Grg3<sup>fl/fl</sup>* animal. Scale bars = 50  $\mu$ m. (D) Immunofluorescent staining of E-cadherin and DBA-lectin of P0 *Grg3* single knockouts showing no visible defects in delamination of the endocrine population. Scale bars = 50  $\mu$ m.

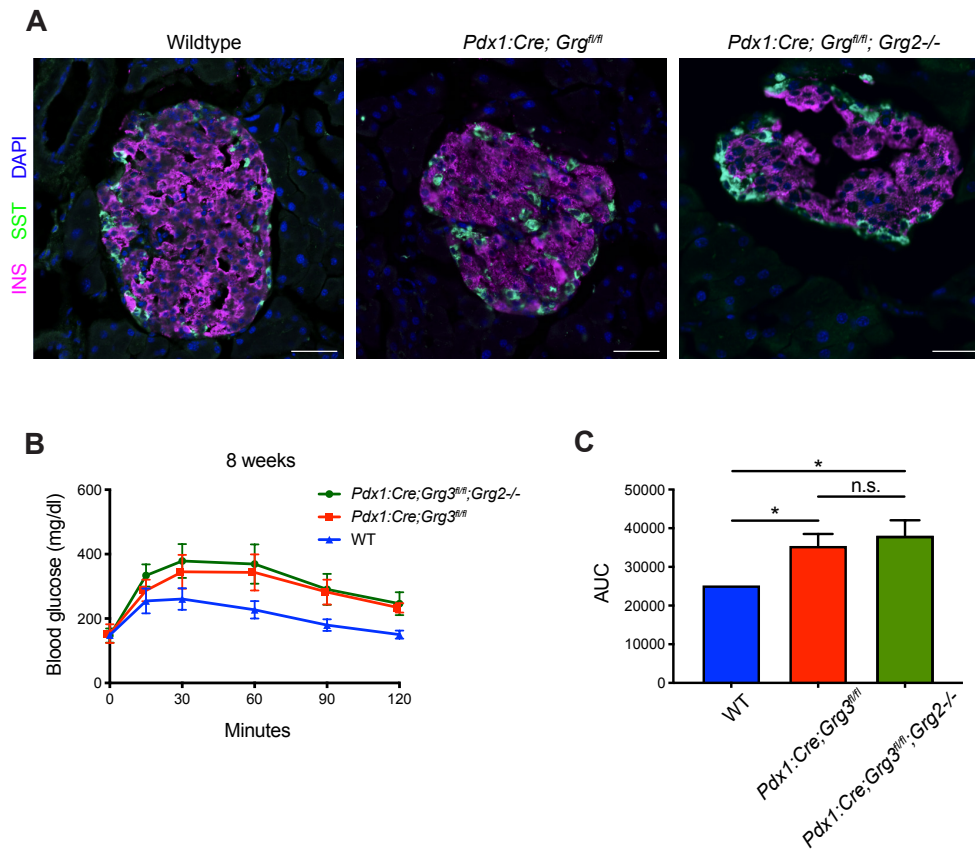

**Figure S2. Loss of *Grg2* does not exacerbate *Grg3* knockout phenotype.**

(A) Immunofluorescent analysis of islets from 7 month control *Grg3* and *Grg2/3* knockout mice showing no visible worsening of the *Grg3* islet phenotype with additional loss of *Grg2*. Scale bars = 50  $\mu$ m. (B) Glucose tolerance tests of 8 week *Grg3* and *Grg2/3* mutants. (C) AUC calculation of (B) showing no difference between *Grg3* and *Grg2/3* mutants. n = 4-6 for all genotypes. \* $P < 0.05$ ; two-tailed student's t-test.

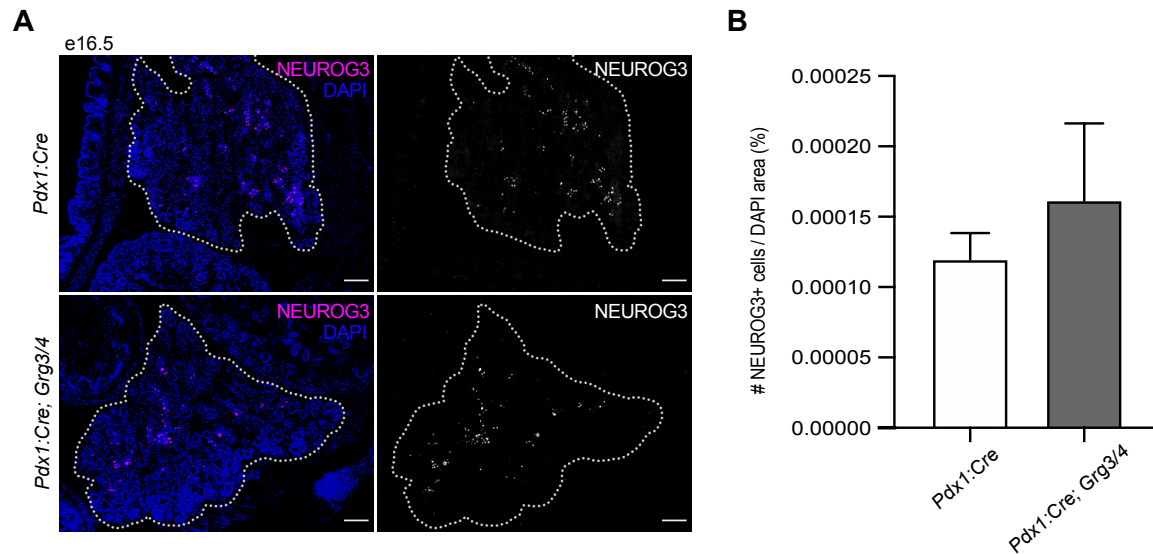

**Figure S3. NEUROG3+ endocrine progenitors are unchanged in e16.5 *Pdx1:Cre*; *Grg3/4* mice.**

(A) Immunofluorescent staining of e16.5 embryos for endocrine progenitor (NEUROG3+) population. Scale bars = 50  $\mu$ m. (B) Quantification of NEUROG3+ cells in (A). n = 3 for each genotype.

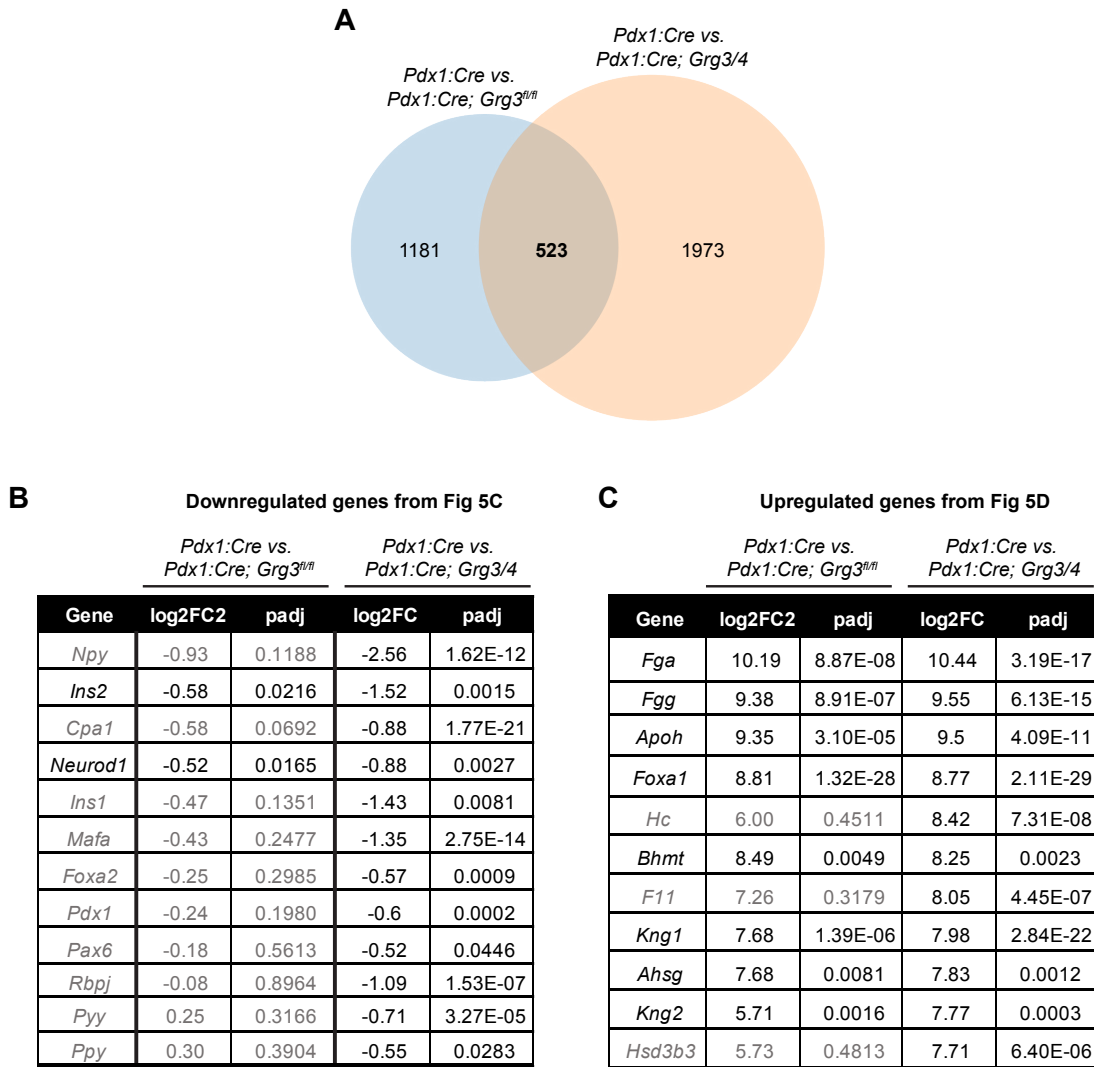

**Figure S4. Comparison of differentially expressed genes in *Pdx1:Cre; Grg3<sup>fl/fl</sup>* vs. *Pdx1:Cre; Grg3/4* e18.5 pancreata.**

(A) Venn diagram showing *Pdx1:Cre; Grg3/4* e18.5 pancreata have more differentially expressed genes than *Pdx1:Cre; Grg3<sup>fl/fl</sup>* when compared to *Pdx1:Cre* controls. 523 genes are differentially expressed in both groups. (B) Select list of downregulated genes related to pancreas development and hormone expression from Fig. 5C including *Pdx1:Cre* vs *Pdx1:Cre; Grg3<sup>fl/fl</sup>* comparison. Gray text indicates padj > 0.05 in the *Pdx1:Cre; Grg3<sup>fl/fl</sup>* comparison. (C) Top 10 upregulated genes sorted by fold change including *Pdx1:Cre* vs *Pdx1:Cre; Grg3<sup>fl/fl</sup>* comparison. Gray text indicates padj > 0.05 in the *Pdx1:Cre; Grg3<sup>fl/fl</sup>* comparison.

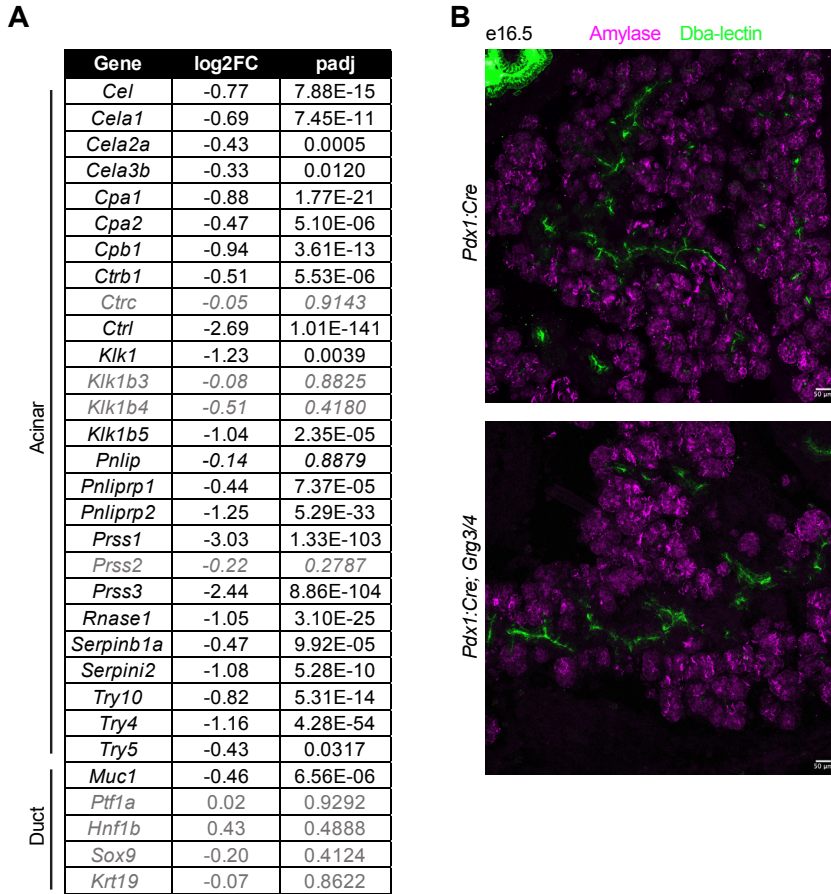

**Figure S5. Overall pancreas morphology appears unaffected by loss of *Grg3/4*.**

(A) List of acinar and duct genes from e18.5 RNA-seq analysis of *Pdx1:Cre* vs *Pdx1:Cre*; *Grg3/4* pancreata. Gray text indicates *padj* > 0.05 in the *Pdx1:Cre*; *Grg3<sup>fl/fl</sup>* comparison.

(B) Immunofluorescent analysis of acinar (amylase) and duct (Dbal-lectin) tissue e16.5 pancreata from control and *Pdx1:Cre*; *Grg3/4* mice showing no visual differences between genotypes. Scale bars = 100  $\mu$ m.

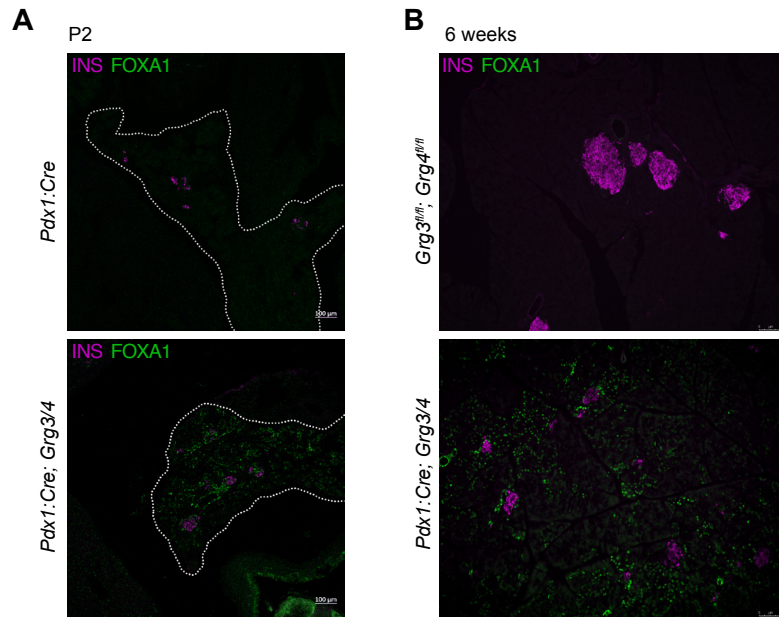

**Figure S6. FOXA1 protein is maintained through 6 weeks of age in *Pdx1:Cre*; *Grg3/4* mutants.**

(A) Immunofluorescent staining of P2 pancreata for INS and FOXA1 showing ectopic expression of FOXA1 in the pancreas of *Pdx1:Cre*; *Grg3/4* mutants. Scale bars = 100 μm.  
(B) Immunofluorescent staining of 6 week pancreata as in (A), showing ectopic FOXA1 protein maintained through 6 weeks of age. Scale bars = 100 μm.

**Table S1. Differentially expressed *Foxa1* targets in e18.5 *Pdx1:Cre; Grg3/4* mutant pancreata.**

[Click here to Download Table S1](#)

**Table S2. Primers used for mouse genotyping.**

| Primer name  | Sequence                                 |
|--------------|------------------------------------------|
| Pdx1Cre_FWD  | 5'-CTG GAC TAC ATC TTG AGT TGC-3'        |
| Pdx1Cre_REV  | 5'-GGT GTA CGG TCA GTA AAT TTG-3'        |
| GenCre_FWD   | 5' CTG CCA CGA CCA AGT GAC AGC 3'        |
| GenCre_REV   | 5' CTT CTC TAC ACC TGC GGT GCT 3'        |
| Grg2WT_FWD   | 5' GGG ATT CTA GGA TTC TAG GCA GGG C 3'  |
| Grg2WT_REV   | 5' TTG AGG CAT GGT CTT GCT TTG TAG C 3'  |
| Grg2KO_FWD   | 5' GCA GCC TCT GTT CCA CAT ACA CTT CA 3' |
| Grg2KO_REV   | 5' AGA GCC AGG AAG ATG GTT CAG TTG G 3'  |
| Grg3flox_FWD | 5' GCT CCC TTC TTC AGC TTC CT 3'         |
| Grg3flox_REV | 5' GCT CCA AGA GGG ATT TTT AT 3'         |
| Grg4flox_FWD | 5' AGA AAT GCA GCC CAG AGT AA 3'         |
| Grg4flox_REV | 5' GGA GAC TTG GAA AAC GCT GA 3'         |



**Table S3. Antibodies used for immunofluorescence and western blotting.**

| Target                   | Company/Source              | Catalog # | Host species | Concentration |
|--------------------------|-----------------------------|-----------|--------------|---------------|
| Alpha1 antitrypsin (AAT) | Thermo Fisher               | PA5-16661 | Rabbit       | 1:250         |
| DAPI                     | Thermo Fisher               | D1306     | NA           | 1:1000        |
| DBA-lectin, fluorescein  | Vector                      | FL-1031   | NA           | 1:100         |
| E-cadherin               | BD Biosciences              | 610182    | Mouse        | 1:100         |
| Foxa1                    | Sigma                       | HPA050505 | Rabbit       | 1:200         |
| GAPDH                    | Abcam                       | ab9485    | Rabbit       | 1:1000 (WB)   |
| Glucagon                 | Cell Signaling Technologies | 2760S     | Rabbit       | 1:500         |
| Insulin                  | Dako/Agilent                | IR00261-2 | Guinea pig   | 1:1000        |
| Ki67                     | Abcam                       | Ab15580   | Rabbit       | 1:500         |
| Neurod1                  | Sigma                       | HPA003278 | Rabbit       | 1:200         |
| Neurogenin3              | From C. Wright              | NA        | Rabbit       | 1:200         |
| Pdx1                     | Abcam                       | ab47308   | Guinea pig   | 1:500         |
| Somatostatin             | Santa Cruz                  | sc-47706  | Rat          | 1:500         |
| TLE3 (Grg3)              | Santa Cruz                  | sc-9124   | Rabbit       | 1:100 (WB)    |
| 488 anti-guinea pig      | Thermo Fisher/Invitrogen    | A11073    | Goat         | 1:500         |
| 555 anti-guinea pig      | Thermo Fisher/Invitrogen    | A21435    | Goat         | 1:500         |
| 488 anti-rabbit          | Thermo Fisher/Invitrogen    | A21206    | Donkey       | 1:500         |
| 594 anti-rabbit          | Thermo Fisher/Invitrogen    | A21207    | Donkey       | 1:500         |
| 647 anti-rabbit          | Thermo Fisher/Invitrogen    | A21244    | Goat         | 1:500         |
| 647 anti-rat             | Thermo Fisher/Invitrogen    | A21247    | Goat         | 1:500         |

**Table S4. Taqman probes used for RT-qPCR**

| <b>Gene name</b>     | <b>Company</b> | <b>Catalog number</b> |
|----------------------|----------------|-----------------------|
| <i>Chga</i>          | ThermoFisher   | Mm00514341_m1         |
| <i>Cyclophilin B</i> | ThermoFisher   | Mm00478295_m1         |
| <i>Ecad</i>          | ThermoFisher   | Mm01247357_m1         |
| <i>Gcg</i>           | ThermoFisher   | Mm00514341_m1         |
| <i>Grg2</i>          | ThermoFisher   | Mm00498094_m1         |
| <i>Grg3</i>          | ThermoFisher   | Mm00437097_m1         |
| <i>Grg4</i>          | ThermoFisher   | Mm01195172_m1         |
| <i>Ins1</i>          | ThermoFisher   | Mm00801712_m1         |
| <i>Ins2</i>          | ThermoFisher   | Mm00801712_m1         |
| <i>PP</i>            | ThermoFisher   | Mm00435889_m1         |
| <i>Sst</i>           | ThermoFisher   | Mm00436671_m1         |
